# Supplementary material
Source: ML conference proceedings conference paper supplement (https://proceedings.neurips.cc/paper_files/paper/2022/hash/e0ccda3cb17b084a6f43c62cfac4784b-Abstract.html)
Supplement: Supplementary file 1 [file e0ccda3cb17b084a6f43c62cfac4784b-Supplemental-Conference.zip]

Archive with 1 entries (1 files):
- BootstrappedTransformerForORLAppendix.pdf
